# Supplementary material
Source: ML conference proceedings conference paper supplement (https://proceedings.mlr.press/v70/odena17a.html)
Supplement: Supplementary file [file odena17a-supp.pdf]

---

# Conditional Image Synthesis with Auxiliary Classifier GANs: Appendix

---

Augustus Odena<sup>1</sup> Christopher Olah<sup>1</sup> Jonathon Shlens<sup>1</sup>

## 1. Hyperparameters

We summarize hyperparameters used for the ImageNet model in Table 1 and for the CIFAR-10 model in Table 2.

Conditional Image Synthesis with Auxiliary Classifier GANs: Appendix

| Operation                                | Kernel                                                           | Strides      | Feature maps | BN? | Dropout | Nonlinearity |
|------------------------------------------|------------------------------------------------------------------|--------------|--------------|-----|---------|--------------|
| $G_x(z)$ – $110 \times 1 \times 1$ input |                                                                  |              |              |     |         |              |
| Linear                                   | N/A                                                              | N/A          | 768          | ×   | 0.0     | ReLU         |
| Transposed Convolution                   | $5 \times 5$                                                     | $2 \times 2$ | 384          | ✓   | 0.0     | ReLU         |
| Transposed Convolution                   | $5 \times 5$                                                     | $2 \times 2$ | 256          | ✓   | 0.0     | ReLU         |
| Transposed Convolution                   | $5 \times 5$                                                     | $2 \times 2$ | 192          | ✓   | 0.0     | ReLU         |
| Transposed Convolution                   | $5 \times 5$                                                     | $2 \times 2$ | 3            | ×   | 0.0     | Tanh         |
| $D(x)$ – $128 \times 128 \times 3$ input |                                                                  |              |              |     |         |              |
| Convolution                              | $3 \times 3$                                                     | $2 \times 2$ | 16           | ×   | 0.5     | Leaky ReLU   |
| Convolution                              | $3 \times 3$                                                     | $1 \times 1$ | 32           | ✓   | 0.5     | Leaky ReLU   |
| Convolution                              | $3 \times 3$                                                     | $2 \times 2$ | 64           | ✓   | 0.5     | Leaky ReLU   |
| Convolution                              | $3 \times 3$                                                     | $1 \times 1$ | 128          | ✓   | 0.5     | Leaky ReLU   |
| Convolution                              | $3 \times 3$                                                     | $2 \times 2$ | 256          | ✓   | 0.5     | Leaky ReLU   |
| Convolution                              | $3 \times 3$                                                     | $1 \times 1$ | 512          | ✓   | 0.5     | Leaky ReLU   |
| Linear                                   | N/A                                                              | N/A          | 11           | ×   | 0.0     | Soft-Sigmoid |
| Optimizer                                | Adam ( $\alpha = 0.0002$ , $\beta_1 = 0.5$ , $\beta_2 = 0.999$ ) |              |              |     |         |              |
| Batch size                               | 100                                                              |              |              |     |         |              |
| Iterations                               | 50000                                                            |              |              |     |         |              |
| Leaky ReLU slope                         | 0.2                                                              |              |              |     |         |              |
| Weight, bias initialization              | Isotropic gaussian ( $\mu = 0$ , $\sigma = 0.02$ ), Constant(0)  |              |              |     |         |              |

Table 1. ImageNet hyperparameters. A Soft-Sigmoid refers to an operation over  $K + 1$  output units where we apply a Softmax activation to  $K$  of the units and a Sigmoid activation to the remaining unit. We also use activation noise in the discriminator as suggested in (?).

|                                        | Operation                           | Kernel                                                                             | Strides      | Feature maps | BN? | Dropout | Nonlinearity |
|----------------------------------------|-------------------------------------|------------------------------------------------------------------------------------|--------------|--------------|-----|---------|--------------|
| $G_x(z) - 110 \times 1 \times 1$ input |                                     |                                                                                    |              |              |     |         |              |
|                                        | Linear                              | N/A                                                                                | N/A          | 384          | ×   | 0.0     | ReLU         |
|                                        | Transposed Convolution              | $5 \times 5$                                                                       | $2 \times 2$ | 192          | ✓   | 0.0     | ReLU         |
|                                        | Transposed Convolution              | $5 \times 5$                                                                       | $2 \times 2$ | 96           | ✓   | 0.0     | ReLU         |
|                                        | Transposed Convolution              | $5 \times 5$                                                                       | $2 \times 2$ | 3            | ×   | 0.0     | Tanh         |
| $D(x) - 32 \times 32 \times 3$ input   |                                     |                                                                                    |              |              |     |         |              |
|                                        | Convolution                         | $3 \times 3$                                                                       | $2 \times 2$ | 16           | ×   | 0.5     | Leaky ReLU   |
|                                        | Convolution                         | $3 \times 3$                                                                       | $1 \times 1$ | 32           | ✓   | 0.5     | Leaky ReLU   |
|                                        | Convolution                         | $3 \times 3$                                                                       | $2 \times 2$ | 64           | ✓   | 0.5     | Leaky ReLU   |
|                                        | Convolution                         | $3 \times 3$                                                                       | $1 \times 1$ | 128          | ✓   | 0.5     | Leaky ReLU   |
|                                        | Convolution                         | $3 \times 3$                                                                       | $2 \times 2$ | 256          | ✓   | 0.5     | Leaky ReLU   |
|                                        | Convolution                         | $3 \times 3$                                                                       | $1 \times 1$ | 512          | ✓   | 0.5     | Leaky ReLU   |
|                                        | Linear                              | N/A                                                                                | N/A          | 11           | ×   | 0.0     | Soft-Sigmoid |
|                                        | Generator Optimizer                 | Adam ( $\alpha = [0.0001, 0.0002, 0.0003]$ , $\beta_1 = 0.5$ , $\beta_2 = 0.999$ ) |              |              |     |         |              |
|                                        | Discriminator Optimizer             | Adam ( $\alpha = [0.0001, 0.0002, 0.0003]$ , $\beta_1 = 0.5$ , $\beta_2 = 0.999$ ) |              |              |     |         |              |
|                                        | Batch size                          | 100                                                                                |              |              |     |         |              |
|                                        | Iterations                          | 50000                                                                              |              |              |     |         |              |
|                                        | Leaky ReLU slope                    | 0.2                                                                                |              |              |     |         |              |
|                                        | Activation noise standard deviation | $[0, 0.1, 0.2]$                                                                    |              |              |     |         |              |
|                                        | Weight, bias initialization         | Isotropic gaussian ( $\mu = 0$ , $\sigma = 0.02$ ), Constant(0)                    |              |              |     |         |              |

Table 2. CIFAR-10 hyperparameters. When a list is given for a hyperparameter it means that we performed a grid search using the values in the list. For each set of hyperparameters, a single AC-GAN was trained on the whole CIFAR-10 dataset. For each AC-GAN that was trained, we split up the samples into groups so that we could give some sense of the variance of the Inception Score. To the best of our knowledge, this is identical to the analysis performed in (?).
